# Supplementary material for: Simulating the mid-Holocene, last interglacial and mid-Pliocene climate with EC-Earth3-LR
Source: Copernicus journal article supplement (doi:10.5194/gmd-14-1147-2021), 2021-02-26
Supplement: Supplementary file 1 [file gmd-14-1147-2021-supplement.zip]

Archive with 3 entries (3 files):
- gmd-14-1147-2021-supplement-title-page.pdf
- Supplementary_Model-data_comparison.xlsx
- PMIP4-EC-Earth-Supplement.pdf
