# Supplementary material for: Simulating the mid-Holocene, last interglacial and mid-Pliocene climate with EC-Earth3-LR
Source: Copernicus journal article supplement (doi:10.5194/gmd-14-1147-2021), 2021-02-26
Supplement: Supplementary file 1 [file gmd-14-1147-2021-supplement.zip › gmd-14-1147-2021-supplement-title-page.pdf]

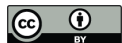

## *Supplement of*

# **Simulating the mid-Holocene, last interglacial and mid-Pliocene climate with EC-Earth3-LR**

**Qiong Zhang et al.**

*Correspondence to:* Qiong Zhang (qiong.zhang@natgeo.su.se)

- [gmd-14-1147-2021-supplement-title-page.pdf](#)
- [PMIP4-EC-Earth-Supplement.pdf](#)
- [Supplementary\\_Model-data\\_comparison.xlsx](#)

The copyright of individual parts of the supplement might differ from the CC BY 4.0 License.
