# Supplementary material for: Simulating the mid-Holocene, last interglacial and mid-Pliocene climate with EC-Earth3-LR
Source: Copernicus journal article supplement (doi:10.5194/gmd-14-1147-2021), 2021-02-26
Supplement: Supplementary file 1 [file gmd-14-1147-2021-supplement.zip › Supplementary_Model-data_comparison.xlsx]

## Sheet: LIG_SST_proxy
SITE	Latitude	Longitude	Data_SST	HadISST	Anomaly
North Atlantic
M23323	67.77	5.92	3.98119	7.5162	-3.53501
V28-14	64.78	-29.57	8.89136	6.62448	2.26688		Data_SST	[127ka Mean] Abs. Temp. (°C)
V27-20	54	-46.2	10.7166	6.51321	4.20338		HadISST	[1870-1899] HadISST (°C)
M23414-9	53.53	-20.29	12.2337	12.0401	0.193673		Anomaly	[Data_SST – HadISST] Temperature Anomaly (°C)
V23-82	52.58	-21.93	9.7356	12.3	-2.56438
K708-1	50	-23.74	13.9368	13.0091	0.927681
V29-179	44	-23.51	16.2281	15.7372	0.490956
D-117	42.1	-52.75	17.1603	12.9008	4.25949
V30-97	41	-32.93	17.4491	17.8635	-0.414315
MD95-2040	40.58	-9.87	16.2917	16.3601	-0.0683735
MD01-2444	37.57	-10.13	20.088	17.6703	2.41766
MD01-2444	37.57	-10.13	21.5387	17.6703	3.86844
MD02-2575	29	-87.11	28.2617	24.4713	3.7904
GIK15637-1	27	-18.98	21.446	21.2565	0.189557
M12392-1	25.16	-16.85	17.3393	20.7417	-3.40235
TR126-29	21.33	-93.95	25.122	26.2879	-1.1659
TR126-23	20.48	-95.62	25.0056	26.0738	-1.06816
M35027-1	17.64	-67.17	25.8124	27.4126	-1.60016
V22-196	13.83	-18.97	24.8501	24.7431	0.106998
V28-127	11.65	-80.13	27.4501	27.6263	-0.17619
MD03-2707	2.5	9.39	26.5829	27.3368	-0.753841
V25-59	1.37	-33.48	25.8853	26.928	-1.04275
Pacific Ocean
Y7211-1	43.25	-126.38	16.6357	12.443	4.19271
ODP1020	41	-126.43	14.1759	12.7917	1.38422
ODP1018	36.99	-123.27	15.6633	13.6992	1.96409
MD01-2421	36.02	141.78	22.7836	17.7122	5.0714
ODP893	34.28	-120.03	18.771	14.8613	3.90972
ODP1014A	32.8	-118.9	19.0298	16.046	2.98379
ODP1012	32.28	-118.38	19.681	16.046	3.635
LAPAZ21	22.98	-109.47	27.3142	24.2061	3.10811
ODP1145	19.53	117.63	24.9422	26.4346	-1.49241
ODP1146	19.45	116.27	26.9076	26.2927	0.614902
MD97-2151	8.73	109.87	28.1295	27.624	0.505523
GIK17961-2	8.5	112.33	28.608	28.0094	0.598651
V28-238	1.02	160.48	28.5541	28.8947	-0.340605
W8402A	0.95	-138.95	27.239	26.0146	1.22433
TR163-22	0.5	-92.4	22.9803	24.4369	-1.45656
ODP846	-3.08	-90.82	23.8825	23.435	0.447514
V19-29	-3.57	-83.22	21.2613	22.7166	-1.45525
Y71-6-12	-16.45	-77.57	20.698	19.9193	0.778765
MD06-3018	-23	166.13	27.7732	23.8853	3.88794
MD97-2121	-40.38	177.98	20.3984	14.87	5.52842
RC15-61	-40.62	-77.2	7.91221	13.3735	-5.46127
ODP1123	-41.79	-171.5	16.5479	14.3762	2.17172
MD97-2106	-45.15	146.29	14.0969	11.5378	2.55903
DSDP594	-45.5	174.95	11.3214	10.8677	0.453771
MD97-2120	-45.52	174.93	18.5899	10.8677	7.72222
Y9	-48.24	177.34	13.5931	8.9703	4.62276
MD97-2108	-48.5	149.11	11.4349	9.58306	1.85187
MD97-2109	-50.63	169.38	7.54592	8.85283	-1.30691
Indian Ocean
V34-88	16.52	59.53	25.4697	26.1384	-0.668768
RC12-339	9.13	90.03	27.0695	28.2032	-1.13373
GeoB10038-4	-5.94	103.25	27.7231	28.1669	-0.443875
GeoB10038-4	-5.94	103.25	28.3755	28.1669	0.208595
MD01-2378	-13.08	121.79	28.9751	28.3453	0.629812
V28-345	-17.67	117.95	27.0127	27.2672	-0.254454
MD73-25	-43.82	51.3	5.07883	7.64069	-2.56186
MD88-770	-46.01	96.47	10.1347	7.27351	2.86117
South Atlantic
V22-182	-0.55	-17.27	25.1173	25.7177	-0.600375
V22-182	-0.55	-17.27	22.5408	25.7177	-3.17685
ODP662	-1.38	-11.74	26.4036	25.2932	1.11049
GeoB1105	-1.67	-12.43	27.143	25.3507	1.79228
GeoB1105	-1.67	-12.43	24.8684	25.3507	-0.482337
GeoB1105	-1.67	-12.43	21.181	25.3507	-4.16974
RC13-205	-2.28	5.18	24.4185	25.7188	-1.30023
RC13-205	-2.28	5.18	25.5723	25.7188	-0.146441
GeoB1112	-5.77	-10.74	25.2855	25.3546	-0.069125
GeoB1112	-5.77	-10.74	25.7029	25.3546	0.348294
V22-38	-9.51	-34.25	26.2945	26.8225	-0.52803
V22-38	-9.51	-34.25	25.144	26.8225	-1.67854
V22-174	-10.07	-12.82	25.0412	24.5965	0.444645
V22-174	-10.07	-12.82	24.1465	24.5965	-0.450013
RC13-228	-22.33	11.2	13.721	18.0669	-4.34593
RC13-228	-22.33	11.2	19.552	18.0669	1.48504
RC13-228	-22.33	11.2	21.245	18.0669	3.1781
GeoB1711-4	-23.31	12.38	21.3271	17.206	4.12115
GeoB1710-3	-23.43	11.7	21.0916	18.0648	3.02684
RC13-229	-25.5	11.3	18.2357	18.1532	0.0825588
RC13-229	-25.5	11.3	20.9948	18.1532	2.84167
RC11-86	-35.78	18.45	17.0754	17.5703	-0.494943
RC11-86	-35.78	18.45	21.2342	17.5703	3.66395
MD96-2080	-36.32	19.47	22.2167	18.1108	4.1059
RC12-294	-37.27	-10.1	16.9284	15.159	1.76945
RC12-294	-37.27	-10.1	17.7019	15.159	2.54288
ODP1089	-40.93	9.9	23.1622	11.6866	11.4755
PS2489-2	-42.9	8.97	10.2278	9.77013	0.457709
SST compilation by Hoffman et al. (2017) as used in Williams et al. (2020)
Hoffman, J. S., Clark, P. U., Parnell, A. C. and He, F.: Regional and global sea-surface temperatures during the last interglaciation, Science, 355(6322), 276, doi:10.1126/science.aai8464, 2017.
Williams, C. J. R., Guarino, M.-V., Capron, E., Malmierca-Vallet, I., Singarayer, J. S., Sime, L. C., Lunt, D. J., and Valdes, P. J.: CMIP6/PMIP4 simulations of the mid-Holocene and Last Interglacial using HadGEM3: comparison to the pre-industrial era, previous model versions and proxy data, Clim. Past, 16, 1429–1450, https://doi.org/10.5194/cp-16-1429-2020, 2020.

## Sheet: Plio_SST_proxy
SITE	Latitude	Longitude	Data_SST	HadISST	Anomaly				Reference	Data URL
Monte dei Corvi PP1	43.35	13.34	25.8	17.36	8.44				Herbert et al., 2018a	https://doi.org/10.1594/PANGAEA.885603
DSDP 593	-40.51	167.67	16	15.03	0.97				McClymont et al., 2016	https://www1.ncdc.noaa.gov/pub/data/paleo/contributions_by_author/mcclymont2016/mcclymont2016-dsdp593.txt
DSDP 594	-45.52	174.95	11.9	10.87	1.03				Herbert et al., 2016	https://www.ncdc.noaa.gov/paleo/study/25390
DSDP 607	41	-32.97	21.2	12.55	8.65		Data_SST	[127ka Mean] Abs. Temp. (°C)	Lawrence et al., 2010	https://www1.ncdc.noaa.gov/pub/data/paleo/contributions_by_author/lawrence2010/lawrence2010.txt
DSDP 609	49.88	-24.23	18.5	5.94	12.56		HadISST	[1870-1899] HadISST (°C)	Lawrence and Woodard, 2017	https://www1.ncdc.noaa.gov/pub/data/paleo/contributions_by_author/lawrence2017/lawrence2017-609b.txt
ODP 625	28.83	-87.16	27.6	23.04	4.56		Anomaly	[Data_SST – HadISST] Temperature Anomaly (°C)	Dowsett et al., 2017	https://doi.org/10.5066/F7959G1S
ODP 642	67.23	2.93	13.8	7.16	6.64				Bachem et al., 2016	https://doi.pangaea.de/10.1594/PANGAEA.865205
ODP 662	-1.39	-11.74	27.4	28.37	-0.97				Herbert et al., 2010	https://www1.ncdc.noaa.gov/pub/data/paleo/contributions_by_author/herbert2010/herbert2010.txt
ODP 677	1.2	-84.73	28.4	28.24	0.16				Robinson et al., 2008	https://pubs.usgs.gov/ds/353/
ODP 722	16.62	59.8	27.9	26.14	1.76				Herbert et al., 2016	https://www.ncdc.noaa.gov/paleo/study/25390
ODP 846	-3.1	-90.82	26.3	28.66	-2.36				Herbert et al., 2016	https://www.ncdc.noaa.gov/paleo/study/25390
ODP 882	50.36	167.6	9.5	5.38	4.12				Haug and Sarnthein, 2005	https://doi.pangaea.de/10.1594/PANGAEA.315092
ODP 883	51.2	167.77	8.7	5.31	3.39				Herbert et al., 2016	https://www.ncdc.noaa.gov/paleo/study/25390
ODP 907	69.25	12.7	6.1	7.13	-1.03				Herbert et al., 2018b	https://doi.pangaea.de/10.1594/PANGAEA.885594
ODP 909	78.59	3.07	15.1	1.55	13.55				Dowsett et al., 2017	https://doi.org/10.5066/F7959G1S
*ODP 925	4.2	-43.49	28.7	28.36	0.34				Dowsett et al., 2017	https://doi.org/10.5066/F7959G1S
ODP 958	24	-20	25	25.3	-0.3				Dowsett et al., 2017	https://doi.org/10.5066/F7959G1S
ODP 978	36.23	-2.05	27.2	17.66	9.54				Kh-lifi et al., 2014	https://doi.pangaea.de/10.1594/PANGAEA.863960
ODP 982	57.52	-15.87	17.2	4.64	12.56				Herbert et al., 2016	https://www.ncdc.noaa.gov/paleo/study/25390
ODP 999	12.75	-78.73	28	27.5	0.5				Badger et al., 2013	https://doi.pangaea.de/10.1594/PANGAEA.836116
ODP 1010	29.97	-118.1	17.4	22.33	-4.93				Herbert et al., 2016	https://www.ncdc.noaa.gov/paleo/study/25390
ODP 1018	36.99	-123.28	15.2	17.66	-2.46				Dowsett et al., 2017	https://doi.org/10.5066/F7959G1S
ODP 1062	28.25	-74.41	22.9	23.04	-0.14				Dowsett et al., 2017	https://doi.org/10.5066/F7959G1S
ODP 1073	39.23	-72.28	23.4	14.8	8.6				Dowsett et al., 2017	https://doi.org/10.5066/F7959G1S
ODP 1081	-19.62	11.32	24.3	18.07	6.23				Rosell-Mel- et al., 2014a	https://doi.pangaea.de/10.1594/PANGAEA.841833
ODP 1082	-21.1	11.82	25.9	18.05	7.85				Etourneau et al., 2009	https://doi.pangaea.de/10.1594/PANGAEA.729403
OPD 1084	-25.52	13.03	24.6	16.41	8.19				Rosell-Mel- et al., 2014b	https://doi.pangaea.de/10.1594/PANGAEA.841834
ODP 1087	-31.47	15.32	20.6	17.34	3.26				Petrick et al., 2018	https://doi.pangaea.de/10.1594/PANGAEA.888605
OPD 1088	-41.13	13.57	16.9	12.12	4.78				Herbert et al., 2016	https://www.ncdc.noaa.gov/paleo/study/25390
*OPD 1115	-9.19	151.57	28.9	28.08	0.82				Dowsett et al., 2017	https://doi.org/10.5066/F7959G1S
ODP 1125	-42.55	-178.17	19.7	13.9	5.8				Caballero-Gill et al., 2019	https://doi.pangaea.de/10.1594/PANGAEA.898162
OPD 1143	9.37	113.28	28.9	28.06	0.84				Li et al., 2011	https://doi.pangaea.de/10.1594/PANGAEA.786444
ODP 1146	19.46	116.27	28.6	26.29	2.31				Dowsett et al., 2017	https://doi.org/10.5066/F7959G1S
ODP 1241	5.85	-86.45	28.2	28.32	-0.12				Herbert et al., 2016	https://www.ncdc.noaa.gov/paleo/study/25390
IODP 1308	49.88	-24.24	17.2	5.94	11.26				Dowsett et al., 2017	https://doi.org/10.5066/F7959G1S
IODP 1313	41	-32.95	20.9	12.55	8.35				Dowsett et al., 2017	https://doi.org/10.5066/F7959G1S
IODP 1425	39.49	134.44	18.5	13.22	5.28				Wittkopp et al., 2017	https://doi.pangaea.de/10.1594/PANGAEA.879792
* some readings incorporated in calculations are at the maximum for this paleothermometry method. Actual SST may be higher.
Dataset from Foley and Dowsett (2019) as used in Haywood et al. (2020)
Foley, K. M. and Dowsett, H. J.: Community sourced mid-Piacenzian sea surface temperature (SST) data, US GeologicalSurvey data release, https://doi.org/10.5066/P9YP3DTV, 2019.
Haywood, A. M., Tindall, J. C., Dowsett, H. J., Dolan, A. M., Fo-ley, K. M., Hunter, S. J., Hill, D. J., Chan, W.-L., Abe-Ouchi,A., Stepanek, C., Lohmann, G., Chandan, D., Peltier, W. R., Tan,N., Contoux, C., Ramstein, G., Li, X., Zhang, Z., Guo, C., Ni-sancioglu, K. H., Zhang, Q., Li, Q., Kamae, Y., Chandler, M.A., Sohl, L. E., Otto-Bliesner, B. L., Feng, R., Brady, E. C.,von der Heydt, A. S., B…
